# Supplementary material
Source: Elsevier journal article supplement (https://www.sciencedirect.com/science/article/pii/S0870902516300116)
Supplement: mmc1 [file S0870902516300116:mmc1.docx]

**Article related communications and posters**

**2011**

Mata S, Dias R, Alarcão V, Almeida A, Miranda FL, Teles AG. Sexual dysfunction and cardiovascular disease in the

primary health care setting [poster presentation]. In: 14º Workshop “Educação pela Ciência”, Lisboa, 12 Dezembro 2011. Lisboa: Faculdade de Medicina da Universidade de Lisboa, 2011.

Dias R, Mata S, Alarcão V, Almeida A, Miranda FL, Teles AG. Sexual dysfunction and cardiovascular disease in the primary health care setting [poster presentation]. In: 20th World Congress for Sexual Health, Glasgow, United Kingdom, 12-16 June 2011. Prague: World Association for Sexual Health, 2011.

Alarcão V, Dias R, Mata S, Carreira M, Galvão-Teles A. Sexual dysfunction and cardiovascular disease in the primary

health care setting [abstract]. J Sexual Med. 2011; 8 (Suppl 3) 79-299. Special Issue: Proceedings from the 20th World Congress of Sexual Health Glasgow, United Kingdom, June 12-16, 2011.

**2012**

Mata, S, Alarcão, V, Dias, R, Simões, R, Miranda, FL, Almeida, A, Carreira, M, Teles, AG. Sexual dysfunction and cardiovascular disease in the primary health care setting: exploring sex differences in the Portuguese SEXOS Study.

[poster presentation]. In: 2012 Annual Meeting of the International Academy of Sex Research, Estoril, Lisboa, Portugal, 2012. Wormerveer, The Netherlands: International Society for Sexual Medicine, 2012.
